# Supplementary material
Source: PubMed Central journal article supplement (PMC4640471)
Supplement: NIHMS733736-supplement-Web-based_Supporting_Materials.pdf [file NIHMS733736-supplement-Web-based_Supporting_Materials.pdf]

Received XXXX

(www.interscience.wiley.com) DOI: 10.1002/sim.0000

# Web-based Supporting Materials for “A Marginal-Mean ANOVA Approach for Analyzing Multireader Multicase Radiological Imaging Data” by Stephen Hillis

Copyright © 2013 John Wiley &amp; Sons, Ltd.

This section contains tables showing the derivation of the analysis formulas for the study design examples given in Section 5. These derivations are based on the “Algorithm for deriving mm-ANOVA formulas” template given in Table 5 and illustrated in Table 6 for the factorial study design. For these derivations, notation for test, reader and case effects is similar to that for the factorial model. Standard nesting notation is used; e.g., subscript  $i(j)$  denotes that the factor indexed by  $i$  is nested within the factor indexed by  $j$ , and  $MS[R * C(T)]$  is the mean square for reader-by-case interaction nested within test. Mean squares for the mm-ANOVA model are indicated by a tilde symbol “~” above “MS”; e.g.,  $\widetilde{MS}(T)$  is the mean square due to test for the mm-ANOVA model, and  $MS(T)$  is for the conventional ANOVA model.

Table S1. Mm-ANOVA approach for reader  $\times$  case design (only one test)1. Derive the mm-ANOVA model

- (a) Conventional ANOVA model:  $Y_{jk} = \mu + R_j + C_k + (RC)_{jk} + \varepsilon_{jk}$ ,  $j = 1, \dots, r$ ;  $k = 1, \dots, c$ , with variance components  $\sigma_R^2, \sigma_C^2, \sigma_{RC}^2, \sigma_\varepsilon^2$ . Define  $\sigma^2 \equiv \sigma_{RC}^2 + \sigma_\varepsilon^2$ .
- (b) Mm-ANOVA model (note:  $\tilde{Y}_j = Y_{j\bullet}$ ):  $\tilde{Y}_j = \mu + R_j + \tilde{\varepsilon}_j$  where  $\tilde{\varepsilon}_j = C_\bullet + (RC)_{j\bullet} + \varepsilon_{j\bullet}$ .
- (c) Mm-ANOVA error variance and covariances expressed in terms of conventional ANOVA variance components:  $\sigma_\varepsilon^2 = \frac{1}{c} (\sigma_R^2 + \sigma_C^2 + \sigma^2)$ ,  $\text{Cov}_2 \equiv \text{cov}(\tilde{\varepsilon}_j, \tilde{\varepsilon}_{j'}) = \frac{1}{c} \sigma_C^2, j \neq j'$
- (d) Covariance constraint:  $\text{Cov}_2 \geq 0$

2. Derive the mm-ANOVA test statistic and its null distribution – this step is omitted, since we are only interested in obtained a confidence interval.3. Derive confidence interval for test accuracy

- (a) Mm-ANOVA expected reader-performance parameter:  $\theta = E(\tilde{Y}_j)$
- (b) Corresponding conventional ANOVA parameter:  $\theta = E(Y_{j\bullet}) = \mu$
- (c) Conventional ANOVA estimate:  $\hat{\theta} = Y_{\bullet\bullet}$
- (d)  $Y_{\bullet\bullet} = \mu + R_\bullet + C_\bullet + (RC)_{\bullet\bullet} + \varepsilon_{\bullet\bullet} \implies V = \frac{1}{rc} (c\sigma_R^2 + r\sigma_C^2 + \sigma^2)$ .
- (e)  $V = \frac{1}{rc} E[\text{MS}(R) + \text{MS}(C) - \text{MS}(R * C)]$
- (f)  $V = \frac{1}{r} E[\widetilde{\text{MS}}(R) + U]$  where  $U = \frac{1}{c} [\text{MS}(C) - \text{MS}(R * C)]$
- (g)  $E(U) = \frac{r\sigma_C^2}{c} = r \text{Cov}_2 \implies V = \frac{1}{r} \left\{ E[\widetilde{\text{MS}}(R)] + r \text{Cov}_2 \right\}$
- (h)  $\hat{V} = \frac{1}{r} \left[ \widetilde{\text{MS}}(R) + r \max(\widehat{\text{Cov}}_2, 0) \right]$
- (i)  $\text{df}_2 = \frac{[\widetilde{\text{MS}}(R) + r \max(\widehat{\text{Cov}}_2, 0)]^2}{\frac{[\widetilde{\text{MS}}(R)]^2}{r-1}}$
- (j)  $\hat{\theta} = \tilde{Y}_\bullet$
- (k) CI:  $\tilde{Y}_\bullet \pm t_{\alpha/2; \text{df}_2} \sqrt{\frac{1}{r} \left[ \widetilde{\text{MS}}(R) + r \max(\widehat{\text{Cov}}_2, 0) \right]}$

Table S2. Mm-ANOVA approach for reader-nested-within-test split-plot design

1. Derive the mm-ANOVA model

- (a) Conventional ANOVA model:  $Y_{ijk} = \mu + \tau_i + R_{(i)j} + C_k + (\tau C)_{ik} + (RC)_{(i)jk} + \varepsilon_{ijk}$ ,  $i = 1, \dots, t; j = 1, \dots, r; k = 1, \dots, c$ , with variance components  $\sigma_{R(T)}^2, \sigma_C^2, \sigma_{TC}^2, \sigma_{RC(T)}^2, \sigma_\varepsilon^2$  and constraint  $\sum_{i=1}^t \tau_i = 0$ . Define  $\sigma^2 = \sigma_{RC(T)}^2 + \sigma_\varepsilon^2$ .
- (b) Mm-ANOVA model (note:  $\tilde{Y}_{ij} = Y_{ij\bullet}$ ):  $\tilde{Y}_{ij} = \mu + \tau_i + R_{(i)j} + \tilde{\varepsilon}_{ij}$  where  $\tilde{\varepsilon}_{ij} = C_\bullet + (\tau C)_{i\bullet} + (RC)_{(i)j\bullet} + \varepsilon_{ij\bullet}$  and  $\sum_{i=1}^t \tau_i = 0$
- (c) Mm-ANOVA error variance and covariances expressed in terms of conventional ANOVA variance-components:  $\sigma_\varepsilon^2 = \frac{1}{c}(\sigma_C^2 + \sigma_{TC}^2 + \sigma^2)$ ;  $\text{Cov}_2 \equiv \text{cov}(\tilde{\varepsilon}_{ij}, \tilde{\varepsilon}_{i'j'}) = \frac{1}{c}(\sigma_C^2 + \sigma_{TC}^2)$ ,  $j \neq j'$ ;  $\text{Cov}_3 \equiv \text{cov}(\tilde{\varepsilon}_{ij}, \tilde{\varepsilon}_{i'j'}) = \frac{1}{c}\sigma_C^2$ ,  $i \neq i'$
- (d) Covariance constraints:  $\text{Cov}_2 \geq \text{Cov}_3 \geq 0$

2. Derive the mm-ANOVA test statistic and its null distribution

- (a) Mm-ANOVA model hypothesis of equal test accuracies:  $H_0 : \theta_1 = \dots = \theta_t$  where  $\theta_i = E(\tilde{Y}_{i\bullet})$
- (b) Conventional ANOVA hypothesis:  $\theta_i = E(Y_{i\bullet\bullet}) = \mu + \tau_i \implies H_0 : \tau_1 = \dots = \tau_t = 0$
- (c) Conventional ANOVA expected mean squares

| Mean square    | Expected mean square                                                                    |
|----------------|-----------------------------------------------------------------------------------------|
| $MS(T)$        | $\frac{rc}{(t-1)} \sum_{i=1}^t \tau_i^2 + c\sigma_{R(T)}^2 + r\sigma_{TC}^2 + \sigma^2$ |
| $MS[R(T)]$     | $c\sigma_{R(T)}^2 + \sigma^2$                                                           |
| $MS(C)$        | $tr\sigma_C^2 + r\sigma_{TC}^2 + \sigma^2$                                              |
| $MS(T * C)$    | $r\sigma_{TC}^2 + \sigma^2$                                                             |
| $MS[R * C(T)]$ | $\sigma^2 \equiv \sigma_{RC(T)}^2 + \sigma_\varepsilon^2$                               |

- (d) Conventional ANOVA test statistic:  $F = \frac{MS(T)}{MS[R(T)] + MS(T * C) - MS[R * C(T)]}$
- (e)  $\widetilde{MS}(T) = \frac{1}{c}MS(T)$ ,  $\widetilde{MS}[R(T)] = \frac{1}{c}MS[R(T)]$
- (f)  $F = \frac{\widetilde{MS}(T)}{MS[R(T)] + U}$  where  $U = \frac{1}{c}\{MS(T * C) - MS[R * C(T)]\}$
- (g)  $E\{MS(T * C)\} = r\sigma_{TC}^2 + \sigma^2$ ,  $E\{MS[R * C(T)]\} = \sigma^2 \implies E(U) = \frac{1}{c}(r\sigma_{TC}^2) = r(\text{Cov}_2 - \text{Cov}_3)$ .
- (h)  $F_{OR}^* = \frac{\widetilde{MS}(T)}{MS[R(T)] + r(\text{Cov}_2 - \text{Cov}_3)}$
- (i)  $F_{OR} = \frac{MS(T)}{MS[R(T)] + r\max(\widetilde{\text{Cov}}_2 - \widetilde{\text{Cov}}_3, 0)}$
- (j) Under  $H_0$ ,  $F_{OR} \sim F_{t-1, df_2}$  where  $df_2 = \frac{[\widetilde{MS}[R(T)] + r\max(\widetilde{\text{Cov}}_2 - \widetilde{\text{Cov}}_3, 0)]^2}{[MS[R(T)]]^2 / [t(r-1)]}$

3. Derive confidence intervals

- (a) Mm-ANOVA model test accuracy performance parameters:  $\boldsymbol{\theta} = (\theta_1, \dots, \theta_t)'$ , with:  $\theta_i = E(\tilde{Y}_{i\bullet})$ ,  $i = 1, \dots, t$
- (b) Corresponding conventional ANOVA parameters:  $\theta_i = E(Y_{i\bullet\bullet}) = \mu + \tau_i$
- (c) Conventional ANOVA estimate:  $\hat{\theta}_i = Y_{i\bullet\bullet}$

CI for  $l'(\boldsymbol{\theta})$  with  $\mathbf{l} = (l_1, \dots, l_t)'$ ,  $\sum_{i=1}^t l_i = 0$ :

- (d)  $l'(\hat{\boldsymbol{\theta}}) = \sum_{i=1}^t l_i \hat{\theta}_i = \sum_{i=1}^t l_i Y_{i\bullet\bullet} = \sum_{i=1}^t l_i \tau_i + \sum_{i=1}^t l_i [R_{(i)\bullet} + (\tau C)_{i\bullet} + (RC)_{(i)\bullet\bullet} + \varepsilon_{i\bullet\bullet}]$   
 $\implies V = \sum_{i=1}^t l_i^2 \left[ \frac{\sigma_{R(T)}^2}{r} + \frac{\sigma_{TC}^2}{c} + \frac{\sigma^2}{rc} \right] = \frac{1}{rc} \sum_{i=1}^t l_i^2 [c\sigma_{R(T)}^2 + r\sigma_{TC}^2 + \sigma^2]$
- (e)  $V = \frac{1}{rc} \sum_{i=1}^t l_i^2 E[MS[R(T)] + MS(T * C) - MS[R * C(T)]]$
- (f)  $V = \frac{1}{r} \sum_{i=1}^t l_i^2 E[\widetilde{MS}[R(T)] + U]$  where  $U = \frac{1}{c}\{MS(T * C) - MS[R * C(T)]\}$
- (g)  $E(U) = \frac{r\sigma_{TC}^2}{c} = r(\text{Cov}_2 - \text{Cov}_3) \implies V = \frac{1}{r} \sum_{i=1}^t l_i^2 \left\{ E[\widetilde{MS}[R(T)]] + r(\text{Cov}_2 - \text{Cov}_3) \right\}$

- (h)  $\hat{V} = \frac{1}{r} \sum_{i=1}^t l_i^2 \left\{ \widetilde{\text{MS}} [R(T)] + r \max \left( \widehat{\text{Cov}}_2 - \widehat{\text{Cov}}_3, 0 \right) \right\}$   
 (i)  $\text{df}_2 = \frac{[\widetilde{\text{MS}}[R(T)] + r \max(\widehat{\text{Cov}}_2 - \widehat{\text{Cov}}_3, 0)]^2}{[\widetilde{\text{MS}}[R(T)]]^2 / [t(r-1)]}$  (same as  $\text{df}_2$  in step 2j)  
 (j)  $\hat{\theta}_i = \tilde{Y}_{i\bullet}$   
 (k) CI:  $\sum_{i=1}^t l_i \tilde{Y}_{i\bullet} \pm t_{\alpha/2; \text{df}} \sqrt{\frac{1}{r} \sum_{i=1}^t l_i^2 \left\{ \widetilde{\text{MS}} [R(T)] + r \max \left( \widehat{\text{Cov}}_2 - \widehat{\text{Cov}}_3, 0 \right) \right\}}$

CI for  $\theta_i$

- (d)  $\hat{\theta}_i = Y_{i\bullet\bullet} = \mu + \tau_i + R_{(i)\bullet} + C_{\bullet} + (\tau C)_{i\bullet} + (RC)_{(i)\bullet\bullet} + \varepsilon_{i\bullet\bullet} \Rightarrow V = \frac{1}{rc} \left( c\sigma_{R(T)}^2 + r\sigma_C^2 + r\sigma_{TC}^2 + \sigma^2 \right)$   
 (e)  $V = \frac{1}{trc} E \left\{ t \text{MS} [R(T)] + \text{MS} (C) + (t-1) \text{MS} (T * C) - t \text{MS} [R * C(T)] \right\}$   
 (f)  $V = \frac{1}{tr} E \left\{ t \widetilde{\text{MS}} [R(T)] + U \right\}$  where  $U = \frac{1}{c} (\text{MS} (C) + (t-1) \text{MS} (T * C) - t \text{MS} [R * C(T)])$   
 (g)  $E(U) = \frac{1}{c} tr (\sigma_C^2 + \sigma_{TC}^2) = tr \text{Cov}_2 \Rightarrow V = \frac{1}{r} \left\{ \widetilde{\text{MS}} [R(T)] + r \text{Cov}_2 \right\}$   
 (h)  $\hat{V} = \frac{1}{r} \left\{ \widetilde{\text{MS}} [R(T)] + \max \left( r \widehat{\text{Cov}}_2, 0 \right) \right\}$   
 (i)  $\text{df}_2 = \frac{\left\{ \widetilde{\text{MS}} [R(T)] + \max \left( r \widehat{\text{Cov}}_2, 0 \right) \right\}^2}{\frac{[\widetilde{\text{MS}}[R(T)]]^2}{t(r-1)}}$   
 (j)  $\hat{\theta}_i = \tilde{Y}_{i\bullet}$   
 (k) CI:  $\tilde{Y}_{i\bullet} \pm t_{\alpha/2; \text{df}} \sqrt{\frac{1}{r} \left\{ \widetilde{\text{MS}} [R(T)] + \max \left( r \widehat{\text{Cov}}_2, 0 \right) \right\}}$

4. Derive the non-null distribution  $F_{\text{df}_1, \text{df}_2; \lambda}$  of the step-2  $F$  statistic

- (a) Step 2d  $F$  numerator:  $\text{MS}_{\text{num}} = \text{MS} (T)$ ,  $E[\text{MS} (T)] = \frac{rc}{(t-1)} \sum_{i=1}^t \tau_i^2 + c\sigma_{R(T)}^2 + r\sigma_{TC}^2 + \sigma^2$ ,  
 $\text{df} (\text{MS} (T)) = t-1$ ,  $E(Y_{ijk}) = \mu + \tau_i \Rightarrow \lambda = \frac{\text{df}(\text{MS}_{\text{num}}) \text{MS}_{\text{num}} |_{\mathbf{Y}=E(\mathbf{Y})}}{E(\text{MS}_{\text{num}} | \text{H}_0)} = \frac{rc \sum_{i=1}^t \tau_i^2}{c\sigma_{R(T)}^2 + r\sigma_{TC}^2 + \sigma^2}$   
 (b)  $r\sigma_{TC}^2 + \sigma^2 = c [\sigma_{\varepsilon}^2 + (r-1) \text{Cov}_2 - r \text{Cov}_3] \Rightarrow \lambda = \frac{r \sum_{i=1}^t \tau_i^2}{\sigma_{R(T)}^2 + \sigma_{\varepsilon}^2 + (r-1) \text{Cov}_2 - r \text{Cov}_3}$   
 (c) Step 2h  $F_{\text{OR}}^*$  denominator =  $\widetilde{\text{MS}} [R(T)] + r \left( \widehat{\text{Cov}}_2 - \widehat{\text{Cov}}_3 \right)$ ,  $E \left\{ \widetilde{\text{MS}} [R(T)] \right\} = \frac{1}{c} E \left\{ \text{MS} [R(T)] \right\} =$   
 $\frac{1}{c} \left( c\sigma_{R(T)}^2 + \sigma^2 \right) = \sigma_{R(T)}^2 + \sigma_{\varepsilon}^2 - \text{Cov}_2 \Rightarrow \text{df}_2 = \frac{[\sigma_{R(T)}^2 + \sigma_{\varepsilon}^2 + (r-1) \text{Cov}_2 - r \text{Cov}_3]^2}{\frac{(\sigma_{R(T)}^2 + \sigma_{\varepsilon}^2 - \text{Cov}_2)^2}{t(r-1)}}$   
 (d)  $F_{\text{OR}} \sim F_{t-1, \text{df}_2; \lambda}$

Table S3. Mm-ANOVA approach for case-nested-within-test split-plot study design. Because step 1 shows that this model is the same as the factorial model (Table 6) except that  $\text{Cov}_1$  and  $\text{Cov}_3$  are constrained to zero, there is no need to continue with the other steps.

1. Derive the mm-ANOVA model

- (a) Conventional ANOVA model:  $Y_{ijk} = \mu + \tau_i + R_j + C_{(i)k} + (\tau R)_{ij} + (RC)_{(i)jk} + \varepsilon_{ijk}$ ,  $i = 1, \dots, t; j = 1, \dots, r; k = 1, \dots, c$ , with variance components  $\sigma_R^2, \sigma_{C(T)}^2, \sigma_{TR}^2, \sigma_{RC(T)}^2, \sigma_\varepsilon^2$  and constraint  $\sum_{i=1}^t \tau_i = 0$ . Define  $\sigma^2 = \sigma_{RC(T)}^2 + \sigma_\varepsilon^2$ .
- (b) Mm-ANOVA model ( $\tilde{Y}_{ij} = Y_{ij\bullet}$ ):  $\tilde{Y}_{ij} = \mu + \tau_i + R_j + (\tau R)_{ij} + \tilde{\varepsilon}_{ij}$  where  $\tilde{\varepsilon}_{ij} = C_{(i)\bullet} + (RC)_{(i)j\bullet} + \varepsilon_{ij\bullet}$  and  $\sum_{i=1}^t \tau_i = 0$
- (c) Mm-ANOVA covariances expressed in terms of conventional ANOVA variance components:  $\sigma_\xi^2 = \frac{1}{c} (\sigma_{C(T)}^2 + \sigma^2)$ ,  $\text{Cov}_2 \equiv \text{cov}(\tilde{\varepsilon}_{ij}, \tilde{\varepsilon}_{ij'}) = \frac{1}{c} \sigma_{C(T)}^2$ ,  $\text{Cov}_1 \equiv \text{cov}(\tilde{\varepsilon}_{ij}, \tilde{\varepsilon}_{i'j}) = 0$ ,  $\text{Cov}_3 \equiv \text{cov}(\tilde{\varepsilon}_{ij}, \tilde{\varepsilon}_{i'j'}) = 0$ , where  $i \neq i', j \neq j'$
- (d) Covariance constraints:  $\text{Cov}_2 \geq 0, \text{Cov}_1 = \text{Cov}_3 = 0$

Table S4 Mm-ANOVA approach for case-nested-within-reader split-plot design. Because step 1 shows that this model is the same as the factorial model (Table 6) except that  $\text{Cov}_2$  and  $\text{Cov}_3$  are constrained to zero, there is no need to continue with the other steps.

1. Derive the mm-ANOVA model

- (a) Conventional ANOVA model:  $Y_{ijk} = \mu + \tau_i + R_j + C_{(j)k} + (\tau R)_{ij} + (\tau C)_{i(j)k} + \varepsilon_{ijk}$ ,  $i = 1, \dots, t; j = 1, \dots, r; k = 1, \dots, c$ , with variance components  $\sigma_R^2, \sigma_{C(R)}^2, \sigma_{TR}^2, \sigma_{TC(R)}^2, \sigma_\varepsilon^2$  and constraint  $\sum_{i=1}^t \tau_i = 0$ . Define  $\sigma^2 = \sigma_{TC(R)}^2 + \sigma_\varepsilon^2$ .
- (b) Mm-ANOVA model ( $\tilde{Y}_{ij} = Y_{ij\bullet}$ ):  $\tilde{Y}_{ij} = \mu + \tau_i + R_j + (\tau R)_{ij} + \tilde{\varepsilon}_{ij}$  where  $\tilde{\varepsilon}_{ij} = C_{(j)\bullet} + (\tau C)_{i(j)\bullet} + \varepsilon_{ij\bullet}$  and  $\sum_{i=1}^t \tau_i = 0$
- (c) Mm-ANOVA covariances expressed in terms of conventional ANOVA variance components:  $\sigma_\xi^2 = \frac{1}{c} (\sigma_{C(R)}^2 + \sigma^2)$ ,  $\text{Cov}_1 \equiv \text{cov}(\tilde{\varepsilon}_{ij}, \tilde{\varepsilon}_{i'j}) = \frac{1}{c} \sigma_{C(R)}^2$ ,  $\text{Cov}_2 \equiv \text{cov}(\tilde{\varepsilon}_{ij}, \tilde{\varepsilon}_{ij'}) = 0$ ,  $\text{Cov}_3 \equiv \text{cov}(\tilde{\varepsilon}_{ij}, \tilde{\varepsilon}_{i'j'}) = 0$ , where  $i \neq i', j \neq j'$
- (d) Covariance constraints:  $\text{Cov}_1 \geq 0, \text{Cov}_2 = \text{Cov}_3 = 0$

Table S5. Mm-ANOVA approach for "mixed" split-plot design (reader and case crossed and nested within group)

1. Derive the mm-ANOVA model

- (a) Conventional ANOVA model:  $Y_{hijk} = \mu + \gamma_h + \tau_i + (\gamma\tau)_{hi} + R_{(h)j} + C_{(h)k} + (\tau R)_{(h)ij} + (\tau C)_{(h)ik} + (RC)_{(h)jk} + (\tau RC)_{(h)ijk} + \varepsilon_{hijk}$ ,  $h = 1, \dots, g; i = 1, \dots, t; j = 1, \dots, r; k = 1, \dots, c$ , with variance components  $\sigma_{R(G)}^2, \sigma_{C(G)}^2, \sigma_{TR(G)}^2, \sigma_{TC(G)}^2, \sigma_{RC(G)}^2, \sigma_{TRC(G)}^2, \sigma_\varepsilon^2$  and constraints  $\sum_{i=1}^t \tau_i = \sum_{h=1}^g \gamma_h = \sum_{h=1}^g (\gamma\tau)_{hi} = \sum_{i=1}^t (\gamma\tau)_{hi} = 0$ ;  $\gamma_h$  denotes the effect of group level  $h$  and  $R(G)$  is read "reader nested within group," etc. Define  $\sigma^2 \equiv \sigma_{TRC(G)}^2 + \sigma_\varepsilon^2$ .
- (b) Mm-ANOVA model (note:  $\tilde{Y}_{hij} = Y_{hij\bullet}$ ):  $\tilde{Y}_{hij} = \mu + \gamma_h + \tau_i + (\gamma\tau)_{hi} + R_{(h)i} + (\tau R)_{(h)ij} + \tilde{\varepsilon}_{hij}$  where  $\tilde{\varepsilon}_{hij} = C_{(h)\bullet} + (\tau C)_{(h)i\bullet} + (RC)_{(h)j\bullet} + (\tau RC)_{(h)ij\bullet} + \varepsilon_{hij\bullet}$  and  $\sum_{i=1}^t \tau_i = \sum_{h=1}^g \gamma_h = \sum_{h=1}^g \sum_{i=1}^t (\gamma\tau)_{hi} = 0$
- (c) Mm-ANOVA error variance and covariances expressed in terms of conventional ANOVA variance-components:  $\sigma_\varepsilon^2 = \frac{1}{c} \left( \sigma_{C(G)}^2 + \sigma_{TC(G)}^2 + \sigma_{RC(G)}^2 + \sigma^2 \right)$ ,  $\text{Cov}_1 \equiv \text{cov}(\tilde{\varepsilon}_{hij}, \tilde{\varepsilon}_{hi'j}) = \frac{1}{c} \left( \sigma_{C(G)}^2 + \sigma_{RC(G)}^2 \right)$ ,  $\text{Cov}_2 \equiv \text{cov}(\tilde{\varepsilon}_{hij}, \tilde{\varepsilon}_{hi'j'}) = \frac{1}{c} \left( \sigma_{C(G)}^2 + \sigma_{TC(G)}^2 \right)$ ,  $\text{Cov}_3 \equiv \text{cov}(\tilde{\varepsilon}_{hij}, \tilde{\varepsilon}_{hi'j'}) = \frac{1}{c} \sigma_{C(G)}^2$ , where  $i \neq i', j \neq j'$
- (d) Covariance constraints:  $\text{Cov}_1 \geq \text{Cov}_3, \text{Cov}_2 \geq \text{Cov}_3, \text{Cov}_3 \geq 0$

2. Derive the mm-ANOVA test statistic and its null distribution

- (a) Mm-ANOVA hypothesis of equal test accuracies:  $H_0 : \theta_1 = \dots = \theta_t$  where  $\theta_i = E(\tilde{Y}_{\bullet i \bullet})$
- (b) Conventional ANOVA hypothesis:  $\theta_i = E(Y_{\bullet i \bullet \bullet}) = \mu + \gamma_\bullet + \tau_i + (\gamma\tau)_{\bullet i} \implies H_0 : \tau_1 = \dots = \tau_t = 0$
- (c) Conventional ANOVA expected mean squares

| Mean square      | Expected mean square                                                                                                                                       |
|------------------|------------------------------------------------------------------------------------------------------------------------------------------------------------|
| MS(G)            | $\frac{trc}{(g-1)} \sum_{i=1}^t \gamma_h^2 + tc\sigma_{R(G)}^2 + tr\sigma_{C(G)}^2 + c\sigma_{TR(G)}^2 + r\sigma_{TC(G)}^2 + t\sigma_{RC(G)}^2 + \sigma^2$ |
| MS(T)            | $\frac{grc}{(t-1)} \sum_{i=1}^t \tau_i^2 + c\sigma_{TR(G)}^2 + r\sigma_{TC(G)}^2 + \sigma^2$                                                               |
| MS(G * T)        | $\frac{rc}{(g-1)(t-1)} \sum_{h=1}^g \sum_{i=1}^t (\gamma\tau)_{hi}^2 + \sigma_{TR(G)}^2 + \sigma_{TC(G)}^2 + \sigma^2$                                     |
| MS[R(G)]         | $tc\sigma_{R(G)}^2 + c\sigma_{TR(G)}^2 + t\sigma_{RC(G)}^2 + \sigma^2$                                                                                     |
| MS[C(G)]         | $tr\sigma_{C(G)}^2 + r\sigma_{TC(G)}^2 + t\sigma_{RC(G)}^2 + \sigma^2$                                                                                     |
| MS[T * R(G)]     | $c\sigma_{TR(G)}^2 + \sigma^2$                                                                                                                             |
| MS[T * C(G)]     | $r\sigma_{TC(G)}^2 + \sigma^2$                                                                                                                             |
| MS[R * C(G)]     | $t\sigma_{RC(G)}^2 + \sigma^2$                                                                                                                             |
| MS[T * R * C(G)] | $\sigma^2 \equiv \sigma_{RC(G)}^2 + \sigma_\varepsilon^2$                                                                                                  |

- (d) Conventional model test statistic:  $F = \frac{\text{MS}(T)}{\text{MS}[T * R(G)] + \text{MS}[T * C(G)] - \text{MS}[T * R * C(G)]}$
- (e)  $\widetilde{\text{MS}}(T) = \frac{1}{c} \text{MS}(T)$ ,  $\widetilde{\text{MS}}(G) = \frac{1}{c} \text{MS}(G)$ ,  $\widetilde{\text{MS}}(G * T) = \frac{1}{c} \text{MS}(G * T)$ ,  $\widetilde{\text{MS}}[R(G)] = \frac{1}{c} \text{MS}[R(G)]$ ,  $\widetilde{\text{MS}}[T * R(G)] = \frac{1}{c} \text{MS}[T * R(G)]$
- (f)  $F = \frac{\widetilde{\text{MS}}(T)}{\text{MS}[T * R(G)] + U}$  where  $U = \frac{1}{c} \{ \text{MS}[T * C(G)] - \text{MS}[T * R * C(G)] \}$
- (g)  $E(U) = \frac{r}{c} \sigma_{TC(G)}^2 = r(\text{Cov}_2 - \text{Cov}_3)$
- (h)  $F_{\text{OR}}^* = \frac{\widetilde{\text{MS}}(T)}{\text{MS}[T * R(G)] + r(\text{Cov}_2 - \text{Cov}_3)}$
- (i)  $F_{\text{OR}} = \frac{\widetilde{\text{MS}}(T)}{\text{MS}[T * R(G)] + \max[r(\text{Cov}_2 - \text{Cov}_3), 0]}$
- (j) Under  $H_0$ ,  $F \sim F_{t-1, df_2}$  where  $df_2 = \frac{\{ \widetilde{\text{MS}}[T * R(G)] + \max[r(\text{Cov}_2 - \text{Cov}_3), 0] \}^2}{\frac{\{\text{MS}[T * R(G)]\}^2}{g(t-1)(r-1)}}$

3. Derive confidence intervals

- (a) Mm-ANOVA model test accuracy parameters:  $\theta = (\theta_1, \dots, \theta_t)'$ , with:  $\theta_i = E(\tilde{Y}_{\bullet i \bullet})$ ,  $i = 1, \dots, t$
- (b) Corresponding conventional ANOVA parameters:  $\theta_i = E(Y_{\bullet i \bullet \bullet}) = \mu + \tau_i$

(c) Conventional ANOVA estimate:  $\hat{\theta}_i = Y_{\bullet i \bullet \bullet}$

CI for  $l'(\theta)$  with  $l = (l_1, \dots, l_t)'$ ,  $\sum_{i=1}^t l_i = 0$ :

- (d)  $l'(\hat{\theta}) = \sum_{i=1}^t l_i \hat{\theta}_i = \sum_{i=1}^t l_i Y_{\bullet i \bullet \bullet} = \sum_{i=1}^t l_i \tau_i + \sum_{i=1}^t l_i \left[ (\tau R)_{(\bullet) i \bullet} + (\tau C)_{(\bullet) i \bullet} + (\tau RC)_{(\bullet) i \bullet \bullet} + \varepsilon_{\bullet i \bullet \bullet} \right]$   
 $\Rightarrow V = \sum_{i=1}^t l_i^2 \left[ \frac{\sigma_{TR(G)}^2}{gr} + \frac{\sigma_{TC(G)}^2}{gc} + \frac{\sigma^2}{grc} \right] = \frac{1}{grc} \sum_{i=1}^t l_i^2 \left[ c\sigma_{TR(G)}^2 + r\sigma_{TC(G)}^2 + \sigma^2 \right]$
- (e)  $V = \frac{1}{grc} \sum_{i=1}^t l_i^2 E \left\{ \text{MS} [T * R(G)] + \text{MS} [T * C(G)] - \text{MS} [T * R * C(G)] \right\}$
- (f)  $V = \frac{1}{gr} \sum_{i=1}^t l_i^2 E \left[ \widetilde{\text{MS}} [T * R(G)] + U \right]$  where  $U = \frac{1}{c} \left\{ \text{MS} [T * C(G)] - \text{MS} [T * R * C(G)] \right\}$
- (g)  $E(U) = \frac{r\sigma_{TC(G)}^2}{c} = r(\text{Cov}_2 - \text{Cov}_3) \Rightarrow V = \frac{1}{gr} \sum_{i=1}^t l_i^2 \left\{ E \left[ \widetilde{\text{MS}} [T * R(G)] + r(\text{Cov}_2 - \text{Cov}_3) \right] \right\}$
- (h)  $\hat{V} = \frac{1}{gr} \sum_{i=1}^t l_i^2 \left\{ \widetilde{\text{MS}} [T * R(G)] + \max \left[ r \left( \widehat{\text{Cov}}_2 - \widehat{\text{Cov}}_3 \right), 0 \right] \right\}$
- (i)  $df_2 = \frac{\left\{ \widetilde{\text{MS}} [T * R(G)] + \max \left[ r \left( \widehat{\text{Cov}}_2 - \widehat{\text{Cov}}_3 \right), 0 \right] \right\}^2}{\left[ \widetilde{\text{MS}} [T * R(G)] \right]^2 / [g(t-1)(r-1)]}$  (same as  $df_2$  in step 2j)
- (j)  $\hat{\theta}_i = \tilde{Y}_{\bullet i \bullet}$
- (k) CI:  $\sum_{i=1}^t l_i \tilde{Y}_{\bullet i \bullet} \pm t_{\alpha/2; df_2} \sqrt{\frac{1}{gr} \sum_{i=1}^t l_i^2 \left\{ \widetilde{\text{MS}} [T * R(G)] + \max \left[ r \left( \widehat{\text{Cov}}_2 - \widehat{\text{Cov}}_3 \right), 0 \right] \right\}}$

CI for  $\theta_i$

- (d)  $\hat{\theta}_i = Y_{\bullet i \bullet \bullet} = \mu + \tau_i + R_{(\bullet) \bullet} + (\tau R)_{(\bullet) i \bullet} + C_{(\bullet) \bullet} + (\tau C)_{(\bullet) i \bullet} + (RC)_{(\bullet) \bullet \bullet} + (\tau RC)_{(\bullet) i \bullet \bullet} + \varepsilon_{\bullet i \bullet \bullet} \Rightarrow$   
 $V = \left( \frac{\sigma_{R(G)}^2}{gr} + \frac{\sigma_{TR(G)}^2}{gr} + \frac{\sigma_{C(G)}^2}{gc} + \frac{\sigma_{TC(G)}^2}{gc} + \frac{\sigma_{RC(G)}^2}{grc} + \frac{\sigma^2}{grc} \right)$   
 $= \frac{1}{grc} \left( c\sigma_{R(G)}^2 + c\sigma_{TR(G)}^2 + r\sigma_{C(G)}^2 + r\sigma_{TC(G)}^2 + \sigma_{RC(G)}^2 + \sigma^2 \right)$
- (e)  $V = \frac{1}{gtrc} E \left[ \begin{array}{l} \text{MS} [R(G)] + (t-1) \text{MS} [T * R(G)] + \text{MS} [C(G)] - \text{MS} [R * C(G)] + \\ (t-1) \text{MS} [T * C(G)] - (t-1) \text{MS} [T * R * C(G)] \end{array} \right]$
- (f)  $V = \frac{1}{gtr} E \left[ \widetilde{\text{MS}} [R(G)] + (t-1) \widetilde{\text{MS}} [T * R(G)] + U \right]$  where  
 $U = \frac{1}{c} \left\{ \text{MS} [C(G)] - \text{MS} [R * C(G)] + (t-1) \text{MS} [T * C(G)] - (t-1) \text{MS} [T * R * C(G)] \right\}$
- (g)  $E(U) = \frac{tr}{c} \left( \sigma_{C(G)}^2 + \sigma_{TC(G)}^2 \right) = tr \text{Cov}_2 \Rightarrow V = \frac{1}{gtr} E \left\{ \widetilde{\text{MS}} [R(G)] + (t-1) \widetilde{\text{MS}} [T * R(G)] + tr \text{Cov}_2 \right\}$
- (h)  $\hat{V} = \frac{1}{gtr} \left[ \widetilde{\text{MS}} [R(G)] + (t-1) \widetilde{\text{MS}} [T * R(G)] + tr \max \left( \widehat{\text{Cov}}_2, 0 \right) \right]$
- (i)  $df_2 = \frac{\left\{ \widetilde{\text{MS}} [R(G)] + (t-1) \widetilde{\text{MS}} [T * R(G)] + tr \max \left( \widehat{\text{Cov}}_2, 0 \right) \right\}^2}{\left\{ \widetilde{\text{MS}} [R(G)] \right\}^2 / [g(r-1)] + \left\{ (t-1) \widetilde{\text{MS}} [T * R(G)] \right\}^2 / [g(t-1)(r-1)]}$
- (j)  $\hat{\theta}_i = \tilde{Y}_{\bullet i \bullet}$
- (k) CI:  $\tilde{Y}_{\bullet i \bullet} \pm t_{\alpha/2; df} \sqrt{\frac{1}{gtr} \left[ \widetilde{\text{MS}} [R(G)] + (t-1) \widetilde{\text{MS}} [T * R(G)] + tr \max \left( \widehat{\text{Cov}}_2, 0 \right) \right]}$

#### 4. Derive the non-null distribution $F_{df_1, df_2; \lambda}$ of the step-2 $F$ statistic

- (a) Step 2d  $F$  numerator:  $\text{MS}_{\text{num}} = \text{MS}(T)$ ,  $E[\text{MS}(T)] = \frac{grc}{(t-1)} \sum_{i=1}^t \tau_i^2 + c\sigma_{TR(G)}^2 + r\sigma_{TC(G)}^2 + \sigma^2$ ,  
 $df(\text{MS}(T)) = t-1$ ,  $E(Y_{hijk}) = \mu + \gamma_h + \tau_i + (\gamma\tau)_{hi} \Rightarrow \lambda = \frac{df(\text{MS}) \text{MS} |_{\mathbf{Y}=\mathbf{E}(\mathbf{Y})}}{E(\text{MS} | H_0)} = \frac{grc \sum_{i=1}^t \tau_i^2}{c\sigma_{TR(G)}^2 + r\sigma_{TC(G)}^2 + \sigma^2}$
- (b)  $r\sigma_{TC(G)}^2 + \sigma^2 = c \left[ \sigma_{\varepsilon}^2 - \text{Cov}_1 + (r-1)(\text{Cov}_2 - \text{Cov}_3) \right] \Rightarrow \lambda = \frac{gr \sum_{i=1}^t \tau_i^2}{\sigma_{TR(G)}^2 + \sigma_{\varepsilon}^2 - \text{Cov}_1 + (r-1)(\text{Cov}_2 - \text{Cov}_3)}$
- (c) Step 2h  $F_{\text{OR}}^*$  denominator =  $\widetilde{\text{MS}} [T * R(G)] + r(\text{Cov}_2 - \text{Cov}_3)$ ,  $E \left( \widetilde{\text{MS}} [T * R(G)] \right) =$   
 $\frac{1}{c} E(\text{MS} [T * R(G)]) = \frac{1}{c} \left( c\sigma_{TR(G)}^2 + \sigma^2 \right) = \left( \sigma_{TR(G)}^2 + \sigma_{\varepsilon}^2 - \text{Cov}_1 - \text{Cov}_2 + \text{Cov}_3 \right) \Rightarrow df_2 =$   
 $\frac{\left[ \sigma_{TR(G)}^2 + \sigma_{\varepsilon}^2 - \text{Cov}_1 + (r-1)(\text{Cov}_2 - \text{Cov}_3) \right]^2}{\left[ \sigma_{TR(G)}^2 + \sigma_{\varepsilon}^2 - \text{Cov}_1 - \text{Cov}_2 + \text{Cov}_3 \right]^2 / [g(t-1)(r-1)]}$
- (d)  $F_{\text{OR}} \sim F_{t-1, df_2; \lambda}$



Table S6. Mm-ANOVA approach for replicated test×reader×case factorial study design

1. Derive the mm-ANOVA model

- (a) Conventional ANOVA model:  $Y_{ijkm} = \mu + \tau_i + R_j + C_k + (\tau R)_{ij} + (\tau C)_{ik} + (RC)_{jk} + (\tau RC)_{ijk} + \varepsilon_{ijkm}$ ,  $i = 1, \dots, t; j = 1, \dots, r; k = 1, \dots, c, m = 1, \dots, n$  with variance components  $\sigma_R^2, \sigma_C^2, \sigma_{TR}^2, \sigma_{TC}^2, \sigma_{RC}^2, \sigma_{\tau RC}^2$ , and  $\sigma_\varepsilon^2$  and constraint  $\sum_{i=1}^t \tau_i = 0$ .
- (b) Mm-ANOVA model (note:  $\tilde{Y}_{ijm} = Y_{ij\bullet m}$ ):  
 $\tilde{Y}_{ijm} = \mu + \tau_i + R_j + (\tau R)_{ij} + \tilde{\varepsilon}_{ijm}$  where  $\tilde{\varepsilon}_{ijm} = C_\bullet + (\tau C)_{i\bullet} + (RC)_{j\bullet} + (\tau RC)_{ij\bullet} + \varepsilon_{ij\bullet m}$  and  $\sum_{i=1}^t \tau_i = 0$
- (c) Mm-ANOVA error variance and covariances expressed in terms of conventional ANOVA variance-components:  $\tilde{\sigma}_\varepsilon^2 = \frac{1}{c} (\sigma_C^2 + \sigma_{TC}^2 + \sigma_{RC}^2 + \sigma_{TRC}^2 + \sigma_\varepsilon^2)$ ,  $\text{Cov}_1 \equiv \text{cov}(\tilde{\varepsilon}_{ijm}, \tilde{\varepsilon}_{i'j'm'}) = \frac{1}{c} (\sigma_C^2 + \sigma_{RC}^2)$ ,  $\text{Cov}_2 \equiv \text{cov}(\tilde{\varepsilon}_{ijm}, \tilde{\varepsilon}_{i'j'm'}) = \frac{1}{c} (\sigma_C^2 + \sigma_{TC}^2)$ ,  $\text{Cov}_3 \equiv \text{cov}(\tilde{\varepsilon}_{ijm}, \tilde{\varepsilon}_{i'j'm'}) = \frac{1}{c} \sigma_C^2$ , where  $i \neq i', j \neq j', m = m'$  or  $m \neq m'$ ;  $\text{Cov}_0 \equiv \text{cov}(\tilde{\varepsilon}_{ijm}, \tilde{\varepsilon}_{ijm'}) = \frac{1}{c} (\sigma_C^2 + \sigma_{TC}^2 + \sigma_{RC}^2 + \sigma_{TRC}^2)$ ,  $m \neq m'$
- (d) Covariance constraints:  $\text{Cov}_0 \geq \text{Cov}_1 \geq \text{Cov}_3; \text{Cov}_0 \geq \text{Cov}_2 \geq \text{Cov}_3; \text{Cov}_3 \geq 0$

2. Derive the mm-ANOVA test statistic and its null distribution

- (a) Mm-ANOVA model hypothesis of equal test accuracies:  $H_0 : \theta_1 = \dots = \theta_t$  where  $\theta_i = E(\tilde{Y}_{i\bullet\bullet})$
- (b) Conventional ANOVA model hypothesis:  $\theta_i = E(Y_{i\bullet\bullet\bullet}) = \mu + \tau_i \implies H_0 : \tau_1 = \dots = \tau_t$
- (c) Conventional ANOVA expected mean squares

| Mean square   | Expected mean square                                                                                                  |
|---------------|-----------------------------------------------------------------------------------------------------------------------|
| MS(T)         | $\frac{nr}{(t-1)} \sum_{i=1}^t \tau_i^2 + nc\sigma_{TR}^2 + nr\sigma_{TC}^2 + n\sigma_{TRC}^2 + \sigma_\varepsilon^2$ |
| MS(R)         | $ntc\sigma_R^2 + nc\sigma_{TR}^2 + nt\sigma_{RC}^2 + n\sigma_{TRC}^2 + \sigma_\varepsilon^2$                          |
| MS(C)         | $nr\sigma_C^2 + nr\sigma_{TC}^2 + nt\sigma_{RC}^2 + n\sigma_{TRC}^2 + \sigma_\varepsilon^2$                           |
| MS(T * R)     | $nc\sigma_{TR}^2 + n\sigma_{TRC}^2 + \sigma_\varepsilon^2$                                                            |
| MS(T * C)     | $nr\sigma_{TC}^2 + n\sigma_{TRC}^2 + \sigma_\varepsilon^2$                                                            |
| MS(R * C)     | $nt\sigma_{RC}^2 + n\sigma_{TRC}^2 + \sigma_\varepsilon^2$                                                            |
| MS(T * R * C) | $n\sigma_{TRC}^2 + \sigma_\varepsilon^2$                                                                              |
| MS(error)     | $\sigma_\varepsilon^2$                                                                                                |

- (d) Conventional ANOVA test statistic:  $F = \frac{\text{MS}(T)}{\text{MS}(T*R) + \text{MS}(T*C) - \text{MS}(T*R*C)}$
- (e)  $\overline{\text{MS}}(T) = \frac{1}{c} \text{MS}(T)$ ,  $\overline{\text{MS}}(T * R) = \frac{1}{c} \text{MS}(T * R)$ ,  $\overline{\text{MS}}(R) = \frac{1}{c} \text{MS}(R)$
- (f)  $F = \frac{\overline{\text{MS}}(T)}{\overline{\text{MS}}(T*R) + U}$  where  $U = \frac{1}{c} \{\text{MS}(T * C) - \text{MS}(T * R * C)\}$
- (g)  $E\{\text{MS}(T * C)\} = nr\sigma_{TC}^2 + n\sigma_{TRC}^2 + \sigma_\varepsilon^2$ ,  $E\{\text{MS}(T * R * C)\} = n\sigma_{TRC}^2 + \sigma_\varepsilon^2 \implies E(U) = \frac{1}{c} (nr\sigma_{TC}^2) = nr(\text{Cov}_2 - \text{Cov}_3)$ .
- (h)  $F_{\text{OR}}^* = \frac{\overline{\text{MS}}(T)}{\text{MS}(T*R) + nr(\text{Cov}_2 - \text{Cov}_3)}$
- (i)  $F_{\text{OR}} = \frac{\overline{\text{MS}}(T)}{\text{MS}(T*R) + nr \max(\text{Cov}_2 - \text{Cov}_3, 0)}$
- (j) Under  $H_0$ ,  $F_{\text{OR}} \sim F_{t-1, df_2}$  where  $df_2 = \frac{[\overline{\text{MS}}(T*R) + nr \max(\text{Cov}_2 - \text{Cov}_3, 0)]^2}{[\overline{\text{MS}}(T*R)]^2 / [(t-1)(r-1)]}$

3. Derive confidence intervals

- (a) Mm-ANOVA test accuracy parameters:  $\theta = (\theta_1, \dots, \theta_t)'$ , with  $\theta_i = E(\tilde{Y}_{i\bullet\bullet})$ ,  $i = 1, \dots, t$
- (b) Corresponding conventional ANOVA parameters:  $\theta_i = E(Y_{i\bullet\bullet\bullet}) = \mu + \tau_i$
- (c) Conventional ANOVA estimate:  $\hat{\theta}_i = Y_{i\bullet\bullet\bullet}$

CI for  $l'(\theta)$  with  $l = (l_1, \dots, l_t)'$ ,  $\sum_{i=1}^t l_i = 0$ :

- (d)  $l'(\hat{\theta}) = \sum_{i=1}^t l_i \hat{\theta}_i = \sum_{i=1}^t l_i Y_{i\bullet\bullet\bullet} = \sum_{i=1}^t l_i \tau_i + \sum_{i=1}^t l_i [(\tau R)_{i\bullet\bullet} + (\tau C)_{i\bullet\bullet} + (\tau RC)_{i\bullet\bullet} + \varepsilon_{i\bullet\bullet\bullet}]$   
 $\implies V = \sum_{i=1}^t l_i^2 \left[ \frac{\sigma_{TR}^2}{r} + \frac{\sigma_C^2}{c} + \frac{\sigma_{TRC}^2}{rc} + \frac{\sigma_\varepsilon^2}{nr} \right] = \frac{1}{rc} \sum_{i=1}^t l_i^2 \left[ c\sigma_{TR}^2 + r\sigma_{TC}^2 + \sigma_{TRC}^2 + \frac{\sigma_\varepsilon^2}{n} \right]$

- (e)  $V = \frac{1}{nrc} \left( \sum_{i=1}^t l_i^2 \right) E [\text{MS}(T * R) + \text{MS}(T * C) - \text{MS}(T * R * C)]$
- (f)  $V = \frac{1}{nr} \left( \sum_{i=1}^t l_i^2 \right) E [\widetilde{\text{MS}}(T * R) + U]$  where  $U = \frac{1}{c} \{ \text{MS}(T * C) - \text{MS}(T * R * C) \}$
- (g)  $E(U) = \frac{nr\sigma_{TC}^2}{c} = nr(\text{Cov}_2 - \text{Cov}_3) \Rightarrow V = \frac{1}{nr} \left( \sum_{i=1}^t l_i^2 \right) \left\{ E [\widetilde{\text{MS}}(T * R)] + nr(\text{Cov}_2 - \text{Cov}_3) \right\}$
- (h)  $\hat{V} = \frac{1}{nr} \left( \sum_{i=1}^t l_i^2 \right) \left\{ \widetilde{\text{MS}}(T * R) + \max \left[ nr \left( \widehat{\text{Cov}}_2 - \widehat{\text{Cov}}_3 \right), 0 \right] \right\}$
- (i)  $\text{df}_2 = \frac{[\widetilde{\text{MS}}(T * R) + nr \max(\widehat{\text{Cov}}_2 - \widehat{\text{Cov}}_3, 0)]^2}{[\widetilde{\text{MS}}(T * R)]^2 / [(t-1)(r-1)]}$  (same as  $\text{df}_2$  in step 2j)
- (j)  $\hat{\theta}_i = \tilde{Y}_{i\bullet\bullet}$
- (k) CI:  $\sum_{i=1}^t l_i \tilde{Y}_{i\bullet\bullet} \pm t_{\alpha/2; \text{df}_2} \sqrt{\frac{1}{nr} \left( \sum_{i=1}^t l_i^2 \right) \left\{ \widetilde{\text{MS}}(T * R) + \max \left[ nr \left( \widehat{\text{Cov}}_2 - \widehat{\text{Cov}}_3 \right), 0 \right] \right\}}$
- CI for  $\theta_i$
- (d)  $\hat{\theta}_i = Y_{i\bullet\bullet\bullet} = \tau_i + R_{\bullet} + C_{\bullet} + (\tau R)_{i\bullet} + (\tau C)_{i\bullet} + (RC)_{\bullet\bullet} + (\tau RC)_{i\bullet\bullet} + \varepsilon_{i\bullet\bullet}$   
 $\Rightarrow V = \frac{\sigma_R^2}{r} + \frac{\sigma_C^2}{c} + \frac{\sigma_{TR}^2}{r} + \frac{\sigma_{TC}^2}{c} + \frac{\sigma_{RC}^2}{rc} + \frac{\sigma_{TRC}^2}{rc} + \frac{\sigma_\varepsilon^2}{nrc} = \frac{1}{rc} \left( c\sigma_R^2 + r\sigma_C^2 + c\sigma_{TR}^2 + r\sigma_{TC}^2 + \sigma_{RC}^2 + \sigma_{TRC}^2 + \frac{\sigma_\varepsilon^2}{n} \right)$
- (e)  $V = \frac{1}{ntrc} E[\text{MS}(R) + (t-1)\text{MS}(T * R) + \text{MS}(C) - \text{MS}(R * C) + (t-1)\text{MS}(T * C) - (t-1)\text{MS}(T * R * C)]$
- (f)  $V = \frac{1}{ntr} E [\widetilde{\text{MS}}(R) + (t-1)\widetilde{\text{MS}}(T * R) + U]$  where  
 $U = \frac{1}{c} \{ \text{MS}(C) - \text{MS}(R * C) + (t-1)\text{MS}(T * C) - (t-1)\text{MS}(T * R * C) \}$
- (g)  $E(U) = \frac{ntr}{c} (\sigma_C^2 + \sigma_{\tau C}^2) = ntr \text{Cov}_2 \Rightarrow V = \frac{1}{ntr} \left\{ E [\widetilde{\text{MS}}(R) + (t-1)\widetilde{\text{MS}}(T * R)] + ntr \text{Cov}_2 \right\}$
- (h)  $\hat{V} = \frac{1}{ntr} \left[ \widetilde{\text{MS}}(R) + (t-1)\widetilde{\text{MS}}(T * R) + ntr \max(\widehat{\text{Cov}}_2, 0) \right]$
- (i)  $\text{df}_2 = \frac{[\widetilde{\text{MS}}(R) + (t-1)\widetilde{\text{MS}}(T * R) + ntr \max(\widehat{\text{Cov}}_2, 0)]^2}{[\widetilde{\text{MS}}(R)]^2 / (r-1) + [(t-1)\widetilde{\text{MS}}(T * R)]^2 / [(t-1)(r-1)]}$
- (j)  $\hat{\theta}_i = \tilde{Y}_{i\bullet\bullet}$
- (k) CI:  $\tilde{Y}_{i\bullet\bullet} \pm t_{\alpha/2; \text{df}_2} \sqrt{\frac{1}{ntr} \left[ \widetilde{\text{MS}}(R) + (t-1)\widetilde{\text{MS}}(T * R) + ntr \max(\widehat{\text{Cov}}_2, 0) \right]}$

4. Derive the non-null distribution  $F_{\text{df}_1, \text{df}_2; \lambda}$  of the step-2  $F$  statistic

- (a) Step 2d  $F$  numerator:  $\text{MS}_{\text{num}} = \text{MS}(T)$ ,  $E[\text{MS}(T)] = \frac{nrc}{(t-1)} \sum_{i=1}^t \tau_i^2 + nc\sigma_{TR}^2 + nr\sigma_{TC}^2 + n\sigma_{TRC}^2 + \sigma_\varepsilon^2$ ,  
 $\text{df}[\text{MS}(T)] = t-1$ ,  $E(Y_{ijkm}) = \mu + \tau_i \Rightarrow \lambda = \frac{\text{df}(\text{MS}_{\text{num}}) \text{MS}_{\text{num}} |_{\mathbf{Y}=\mathbf{E}(\mathbf{Y})}}{E(\text{MS}_{\text{num}} | \text{H}_0)} = \frac{nrc \sum_{i=1}^t \tau_i^2}{nc\sigma_{TR}^2 + nr\sigma_{TC}^2 + n\sigma_{TRC}^2 + \sigma_\varepsilon^2}$
- (b)  $nr\sigma_{TC}^2 + n\sigma_{TRC}^2 + \sigma_\varepsilon^2 = nc \left\{ -\text{Cov}_1 + (r-1)(\text{Cov}_2 - \text{Cov}_3) + \sigma_\varepsilon^2/n + [(n-1)/n] \text{Cov}_0 \right\} \Rightarrow \lambda =$   
 $\frac{r \sum_{i=1}^t \tau_i^2}{\sigma_{TR}^2 - \text{Cov}_1 + (r-1)(\text{Cov}_2 - \text{Cov}_3) + \sigma_\varepsilon^2/n + [(n-1)/n] \text{Cov}_0}$
- (c) Step 2h  $F_{\text{OR}}^*$  denominator =  $\widetilde{\text{MS}}(T * R) + nr(\text{Cov}_2 - \text{Cov}_3)$ ,  $E(\widetilde{\text{MS}}(T * R)) = \frac{1}{c} E(\text{MS}(T * R)) =$   
 $\frac{1}{c} (nc\sigma_{TR}^2 + n\sigma_{TRC}^2 + \sigma_\varepsilon^2) = n\sigma_{TR}^2 + \sigma_\varepsilon^2 - n\text{Cov}_1 - n\text{Cov}_2 + n\text{Cov}_3 + (n-1)\text{Cov}_0 \Rightarrow \text{df}_2 =$   
 $\frac{[\sigma_{TR}^2 + \sigma_\varepsilon^2/n - \text{Cov}_1 + (r-1)(\text{Cov}_2 - \text{Cov}_3) + [(n-1)/n] \text{Cov}_0]^2}{[\sigma_{TR}^2 + \sigma_\varepsilon^2/n - \text{Cov}_1 - (\text{Cov}_2 - \text{Cov}_3) + [(n-1)/n] \text{Cov}_0]^2 / [(t-1)(r-1)]}$
- (d)  $F_{\text{OR}} \sim F_{t-1, \text{df}_2; \lambda}$
